# Supplementary material for: The causal effect of serum micronutrients on malignant kidney neoplasm in European descent
Source: Front Oncol. 2023 Aug 16;13:1191825. doi: 10.3389/fonc.2023.1191825 (PMC10469310; doi:10.3389/fonc.2023.1191825)
Supplement: Additional file 1 — Detailed information of the proxied SNPs of serum zinc concentration. [file DataSheet_1.xlsx]

## Sheet: Лист1
SNP	exposure	effect_allele	other_allele	eaf	beta	se	F statistic	R2
rs10097917	serum zinc	A	T	0.39	-0.215	0.0475	20.4444	0.0219939
rs10865352	serum zinc	C	T	0.364	-0.236	0.0478	24.325	0.0257877
rs10982624	serum zinc	A	G	0.386	-0.225	0.0463	23.5661	0.0239967
rs117923562	serum zinc	T	C	0.0165	1.12	0.253	19.5559	0.0407122
rs17212261	serum zinc	C	T	0.454	0.207	0.0465	19.7751	0.0212432
rs17502590	serum zinc	G	A	0.0391	0.553	0.125	19.5305	0.0229792
rs17818486	serum zinc	A	G	0.416	-0.224	0.0456	24.0797	0.0243799
rs180707967	serum zinc	G	A	0.0211	0.806	0.181	19.7878	0.0268362
rs1883606	serum zinc	T	C	0.391	0.205	0.0453	20.436	0.0200139
rs2121468	serum zinc	C	T	0.474	-0.231	0.0446	26.7694	0.0266084
rs2635551	serum zinc	A	T	0.381	0.262	0.0569	21.1574	0.0323779	not found in the outcome
rs2691184	serum zinc	G	A	0.439	-0.215	0.0445	23.2938	0.0227685
rs3104890	serum zinc	T	C	0.233	0.262	0.0562	21.6877	0.0245349
rs35390123	serum zinc	T	G	0.0919	0.391	0.0783	24.8836	0.0255172
rs420236	serum zinc	G	A	0.184	-0.289	0.0636	20.6046	0.0250804
rs4681272	serum zinc	T	C	0.167	0.273	0.0594	21.0783	0.0207356
rs55877204	serum zinc	G	A	0.46	-0.208	0.0461	20.3146	0.0214936
rs74876351	serum zinc	G	T	0.0108	-1.05	0.234	20.0923	0.0235568
rs76804613	serum zinc	C	T	0.185	-0.261	0.059	19.5281	0.0205419
rs77377170	serum zinc	C	G	0.0144	-1.43	0.289	24.4321	0.0580451
rs79479745	serum zinc	A	G	0.0335	-0.671	0.146	21.0777	0.0291556
rs602662	serum Vitamin B12	A	G	0.6	0.16	0.008	400	0.012288
rs34324219	serum Vitamin B12	C	A	0.88	0.21	0.011	364.463	0.00931392
rs1801222	serum Vitamin B12	G	A	0.59	0.11	0.007	246.939	0.00585398
rs1131603	serum Vitamin B12	C	T	0.06	0.19	0.017	124.913	0.00407208
rs41281112	serum Vitamin B12	C	T	0.95	0.17	0.016	112.891	0.0027455
rs1141321	serum Vitamin B12	C	T	0.63	0.061	0.007	75.9388	0.00173473
rs3742801	serum Vitamin B12	T	C	0.29	0.045	0.008	31.6406	0.000833895
rs2270655	serum Vitamin B12	G	C	0.94	0.066	0.016	17.0156	0.000491357
rs778805	serum Vitamin B12	A	G	0.25	0.046	0.009	26.1235	0.0007935
rs1801725	serum calcium	T	G	0.15	0.071	0.004	315.062	0.00128545
rs1570669	serum calcium	G	A	0.34	0.018	0.003	36	0.000145411
rs1550532	serum calcium	C	G	0.31	0.018	0.003	36	0.000138607
rs780094	serum calcium	T	C	0.42	0.017	0.003	32.1111	0.000140801
rs7481584	serum calcium	G	A	0.7	0.018	0.003	36	0.00013608
rs7336933	serum calcium	G	A	0.85	0.022	0.004	30.25	0.00012342
rs10491003	serum calcium	T	C	0.09	0.027	0.005	29.16	0.00011941
rs11132992	serum copper	G	A	0.126	-0.304	0.0643	22.3525	0.0203544
rs11644121	serum copper	A	G	0.31	-0.221	0.0462	22.8823	0.0208942
rs1262685	serum copper	C	T	0.0132	1.11	0.238	21.7516	0.0320981
rs13036590	serum copper	C	T	0.037	0.561	0.115	23.7974	0.0224276
rs134745	serum copper	T	C	0.405	0.193	0.0421	21.016	0.0179522
rs139127800	serum copper	A	G	0.0334	-0.676	0.146	21.4382	0.0295064
rs140699864	serum copper	G	T	0.0291	-0.596	0.132	20.3866	0.020072
rs141434375	serum copper	A	G	0.0201	-1.03	0.208	24.5215	0.041791
rs141617348	serum copper	C	T	0.0106	-1.09	0.244	19.956	0.0249207
rs150074	serum copper	C	G	0.112	-0.315	0.068	21.4587	0.019737
rs186816912	serum copper	C	T	0.0342	-0.658	0.147	20.0363	0.0286019
rs1882090	serum copper	A	T	0.317	-0.208	0.0468	19.7531	0.0187343
rs35746828	serum copper	A	G	0.046	-0.518	0.105	24.3378	0.0235503
rs4777853	serum copper	C	T	0.313	0.207	0.0458	20.4272	0.0184277
rs62334399	serum copper	A	G	0.134	-0.285	0.0633	20.2713	0.0188513
rs62491561	serum copper	G	A	0.0116	1.35	0.284	22.596	0.0417915
rs72810507	serum copper	C	T	0.104	0.389	0.0829	22.0186	0.0282014
rs74792243	serum copper	G	A	0.0429	-0.513	0.111	21.3594	0.0216112
rs75030003	serum copper	A	G	0.0685	-0.421	0.085	24.5316	0.0226187
rs75785654	serum copper	A	G	0.301	0.231	0.0518	19.8868	0.0224542
rs76680160	serum copper	G	A	0.0414	0.675	0.129	27.3797	0.0361639
rs77083672	serum copper	G	C	0.0145	-0.921	0.199	21.4197	0.0242423
rs79497581	serum copper	G	A	0.0157	-1.25	0.261	22.9371	0.0482922
rs80183360	serum copper	G	A	0.0286	-0.589	0.13	20.5279	0.0192763
rs9660771	serum copper	C	T	0.448	0.217	0.0429	25.5861	0.0232898
rs1800562	serum iron	A	G	0.07	0.328	0.016	420.25	0.0140074
rs1799945	serum iron	G	C	0.15	0.189	0.01	357.21	0.00910886
rs855791	serum iron	G	A	0.55	0.181	0.007	668.592	0.0162167
rs11144134	serum magnesium	C	T	0.08	0.011	0.001	121	1.78112e-05
rs13146355	serum magnesium	A	G	0.44	0.005	0.001	25	1.232e-05
rs3925584	serum magnesium	T	C	0.55	0.006	0.001	36	1.782e-05
rs4072037	serum magnesium	T	C	0.54	0.01	0.001	100	4.968e-05
rs448378	serum magnesium	A	G	0.53	0.004	0.001	16	7.9712e-06
rs7965584	serum magnesium	A	G	0.71	0.007	0.001	49	2.01782e-05	not found in the outcome
rs1697421	serum phosphate	A	G	0.49	0.05	0.005	100	0.0012495
rs17265703	serum phosphate	A	G	0.85	0.036	0.006	36	0.00033048
rs9469578	serum phosphate	C	T	0.92	0.059	0.009	42.9753	0.000512403
rs947583	serum phosphate	C	T	0.29	0.035	0.005	49	0.000504455
rs2970818	serum phosphate	A	T	0.09	0.047	0.008	34.5156	0.000361834
rs921943	serum selenium	T	C	0.29	0.25	0.02	156.25	0.0257375
rs567754	serum selenium	C	T	0.67	0.17	0.02	72.25	0.0127796
rs3797535	serum selenium	T	C	0.1	0.21	0.04	27.5625	0.007938
rs11951068	serum selenium	A	G	0.06	0.21	0.04	27.5625	0.00497448
rs705415	serum selenium	C	T	0.88	0.23	0.04	33.0625	0.0111725
rs6586282	serum selenium	C	T	0.85	0.12	0.03	16	0.003672	not found in the outcome
rs1789953	serum selenium	T	C	0.16	0.12	0.03	16	0.00387072	not found in the outcome
